# Supplementary material
Source: HighWire-hosted journal article supplement (https://cmajopen.ca/highwire/filestream/90516/field_highwire_adjunct_files/1/open-2021-0337-1-at.pdf)
Supplement: open-2021-0337-1-at.pdf [file open-2021-0337-1-at.pdf]

# Readiness of Emergency Departments for Pediatric Patients and Pediatric Mortality: A Systematic Review

## APPENDIX A. Search Strategy

**Database(s): Embase 1974 to 2020 May 22, Ovid MEDLINE(R) ALL 1946 to May 22, 2020**

### Search Strategy:

| #  | Searches                                                                                                                                                                                                                                                                                                                                                                                                                                                                                                     | Results |
|----|--------------------------------------------------------------------------------------------------------------------------------------------------------------------------------------------------------------------------------------------------------------------------------------------------------------------------------------------------------------------------------------------------------------------------------------------------------------------------------------------------------------|---------|
| 1  | exp Emergency Service, Hospital/                                                                                                                                                                                                                                                                                                                                                                                                                                                                             | 81863   |
| 2  | exp Emergency Medicine/                                                                                                                                                                                                                                                                                                                                                                                                                                                                                      | 54555   |
| 3  | Emergencies/                                                                                                                                                                                                                                                                                                                                                                                                                                                                                                 | 79791   |
| 4  | exp Emergency Medical Services/                                                                                                                                                                                                                                                                                                                                                                                                                                                                              | 238598  |
| 5  | Trauma Centers/                                                                                                                                                                                                                                                                                                                                                                                                                                                                                              | 106172  |
| 6  | Triage/                                                                                                                                                                                                                                                                                                                                                                                                                                                                                                      | 79729   |
| 7  | Emergency Treatment/                                                                                                                                                                                                                                                                                                                                                                                                                                                                                         | 27354   |
| 8  | Emergency Services, Psychiatric/                                                                                                                                                                                                                                                                                                                                                                                                                                                                             | 2627    |
| 9  | Ambulatory Care/                                                                                                                                                                                                                                                                                                                                                                                                                                                                                             | 78649   |
| 10 | (emergenc\$ adj5 (care\$ or centre\$ or center\$ or department\$ or diagnos\$ or doctor\$ or health care or healthcare or hospital\$ or medicine\$ or nurs\$ or patient\$ or physician\$ or resident\$ or room\$ or service\$ or therap\$ or treatment\$ or unit\$ or ward\$ or visit\$)).mp.                                                                                                                                                                                                                | 677281  |
| 11 | (trauma adj5 (care\$ or centre\$ or center\$ or department\$ or diagnos\$ or doctor\$ or health care or healthcare or hospital\$ or medicine\$ or nurs\$ or patient\$ or physician\$ or resident\$ or room\$ or service\$ or therap\$ or treatment\$ or unit\$ or ward\$ or visit\$)).mp.                                                                                                                                                                                                                    | 174419  |
| 12 | ((urgent or ambulatory or outpatient) adj3 (care\$ or visit\$ or service\$)).tw,kf.                                                                                                                                                                                                                                                                                                                                                                                                                          | 103007  |
| 13 | (emergency or emergencies or trauma).jw.                                                                                                                                                                                                                                                                                                                                                                                                                                                                     | 303584  |
| 14 | emergency.in.                                                                                                                                                                                                                                                                                                                                                                                                                                                                                                | 315103  |
| 15 | or/1-14 [Emergency Room Concept]                                                                                                                                                                                                                                                                                                                                                                                                                                                                             | 1295542 |
| 16 | ((Infan\$ or newborn\$ or new-born\$ or perinat\$ or neonat\$ or baby or baby\$ or babies or toddler\$ or minors or minors\$ or boy or boys or boyfriend or boyhood or girl\$ or kid or kids or child or child\$ or children\$ or schoolchild\$ or schoolchild or school child or school child\$ or adolescen\$ or juvenil\$ or youth\$ or teen\$ or under\$age\$ or pubescen\$ or pediatric\$ or paediatric\$ or peadiatric\$ or prematur\$ or preterm\$) adj5 (ready or readiness or preparedness)).tw,kf. | 4993    |
| 17 | (WPRS and P?ediatric\$).tw,kf.                                                                                                                                                                                                                                                                                                                                                                                                                                                                               | 18      |
| 18 | peds ready.tw,kf.                                                                                                                                                                                                                                                                                                                                                                                                                                                                                            | 3       |
| 19 | or/16-18 [Pediatric Readiness Concept]                                                                                                                                                                                                                                                                                                                                                                                                                                                                       | 4993    |
| 20 | 15 and 19 [Peds Readiness and ER]                                                                                                                                                                                                                                                                                                                                                                                                                                                                            | 673     |
| 21 | 20 use medall                                                                                                                                                                                                                                                                                                                                                                                                                                                                                                | 271     |
| 22 | exp emergency health service/                                                                                                                                                                                                                                                                                                                                                                                                                                                                                | 238598  |
| 23 | exp emergency medicine/                                                                                                                                                                                                                                                                                                                                                                                                                                                                                      | 54555   |
| 24 | exp emergency/                                                                                                                                                                                                                                                                                                                                                                                                                                                                                               | 92866   |
| 25 | exp emergency treatment/                                                                                                                                                                                                                                                                                                                                                                                                                                                                                     | 375865  |
| 26 | exp emergency ward/                                                                                                                                                                                                                                                                                                                                                                                                                                                                                          | 220551  |
| 27 | ambulatory care/                                                                                                                                                                                                                                                                                                                                                                                                                                                                                             | 78649   |
| 28 | (emergenc\$ adj5 (care\$ or centre\$ or center\$ or department\$ or diagnos\$ or doctor\$ or health care or healthcare or hospital\$ or medicine\$ or nurs\$ or patient\$ or physician\$ or                                                                                                                                                                                                                                                                                                                  |         |

## Readiness of Emergency Departments for Pediatric Patients and Pediatric Mortality: A Systematic Review

resident\$ or room\$ or service\$ or therap\$ or treatment\$ or unit\$ or ward\$ or visit\$)).mp.  
677281

29 (trauma adj5 (care\$ or centre\$ or center\$ or department\$ or diagnos\$ or doctor\$ or health care or healthcare or hospital\$ or medicine\$ or nurs\$ or patient\$ or physician\$ or resident\$ or room\$ or service\$ or therap\$ or treatment\$ or unit\$ or ward\$ or visit\$)).mp. 174419

30 ((urgent or ambulatory or outpatient) adj3 (care\$ or visit\$ or service\$)).tw,kw. 103297

31 (emergency or emergencies or trauma).jw. 303584

32 emergency.in. 315103

33 or/22-32 [Emergency Room Concept] 1533859

34 ((Infan\$ or newborn\$ or new-born\$ or perinat\$ or neonat\$ or baby or baby\$ or babies or toddler\$ or minors or minors\$ or boy or boys or boyfriend or boyhood or girl\$ or kid or kids or child or child\$ or children\$ or schoolchild\$ or schoolchild or school child or school child\$ or adolescen\$ or juvenil\$ or youth\$ or teen\$ or under\$age\$ or pubescen\$ or pediatric\$ or paediatric\$ or peadiatric\$ or prematur\$ or preterm\$) adj5 (ready or readiness or preparedness)).tw,kw. 5020

35 (WPRS and P?ediatric\$).tw,kw. 18

36 peds ready.tw,kw. 3

37 or/34-36 [Pediatric Readiness Concept] 5020

38 33 and 37 [Peds Readiness and ER] 745

39 38 use oemezd 448

40 21 or 39 719

41 remove duplicates from 40 473

42 41 use medall 267

43 41 use oemezd 206
